# Supplementary material for: Demographic Patterns and Immunophenotypic Characterization of Tumor–Immune Interactions in Canine Cutaneous Mast Cell Tumors
Source: Research Square preprint supplement (doi:10.21203/rs.3.rs-6766464/v1), 2025-10-26
Supplement: Supplementary file 1 [file 5f9e974f597cf550b8703dd1.pdf]

## Supplementary Information 2

### Demographic Patterns and Immunophenotypic Characterization of Tumor–Immune Interactions in Canine Cutaneous Mast Cell tumors

Sudchaya Bhanpattanakul<sup>1</sup>, Theerawat Tharasanit<sup>2,3</sup>, Achariya Sailasuta<sup>1</sup>, Takayuki Nakagawa<sup>4</sup>,  
Theerayuth Kaewamatawong<sup>1,5\*</sup>

<sup>1</sup> Department of Pathology, Faculty of Veterinary Science, Chulalongkorn University, Bangkok, Thailand

<sup>2</sup> Department of Obstetrics, Gynaecology and Reproduction, Faculty of Veterinary Science, Chulalongkorn University, Bangkok, Thailand

<sup>3</sup> Veterinary Clinical Stem Cells and Bioengineering Research Unit, Chulalongkorn University, Bangkok, Thailand

<sup>4</sup> Laboratory of Veterinary Surgery, Graduate School of Agricultural and Life Sciences, University of Tokyo, 1-1-1, Yayoi, Bunkyo-ku, Tokyo, 113-8657, Japan

<sup>5</sup> Center of Excellence for Companion Animal Cancer (CE-CAC), Department of Pathology, Faculty of Veterinary Science, Chulalongkorn University, Bangkok, Thailand.

Corresponding Author:

Theerayuth Kaewamatawong<sup>1,5\*</sup>

Email address: [theerayuth.k@chula.ac.th](mailto:theerayuth.k@chula.ac.th)

## Supplementary Figures

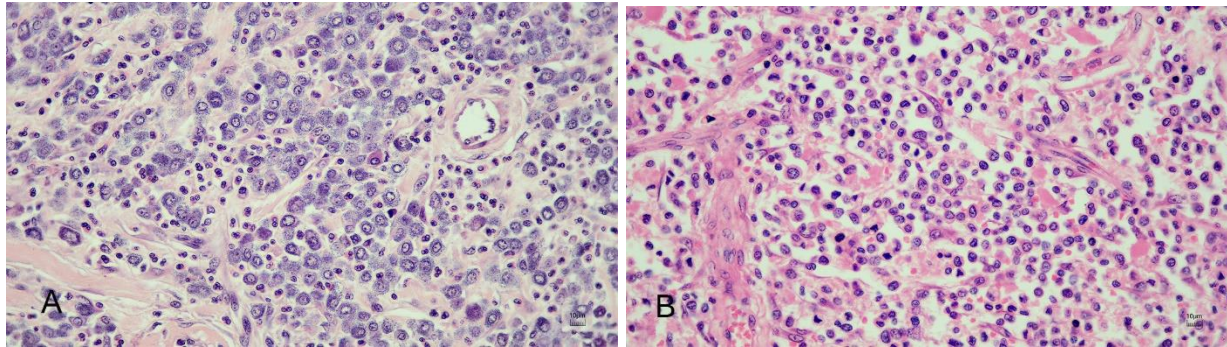

**Figure S1.** Representative histological features of canine cutaneous mast cell tumors (MCTs) stained with hematoxylin and eosin (H&E) at 40 $\times$  magnification. (A) Low-grade MCT showing well-differentiated mast cells with round nuclei, mild anisokaryosis, and sparse mitotic figures within a moderately fibrotic stroma. (B) High-grade MCT demonstrating pleomorphic, poorly differentiated mast cells with marked anisokaryosis, increased mitotic activity, and multifocal necrosis. Scale bar = 10  $\mu$ m.

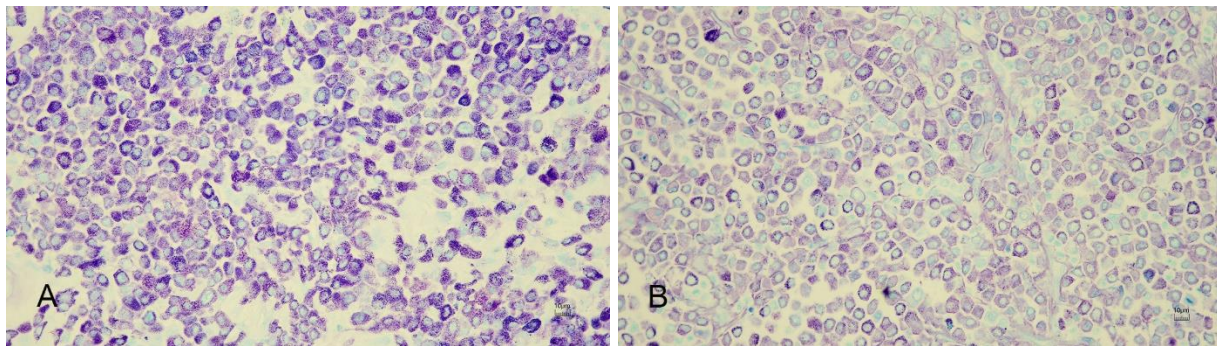

**Figure S2.** Toluidine blue staining of canine cutaneous mast cell tumors (MCTs) at 40 $\times$  magnification. (A) Low-grade MCT displaying abundant, well-granulated mast cells with metachromatic cytoplasmic granules and mild nuclear atypia. (B) High-grade MCT characterized by fewer granulated mast cells, increased nuclear pleomorphism, and diminished metachromasia. Scale bar = 10  $\mu$ m.

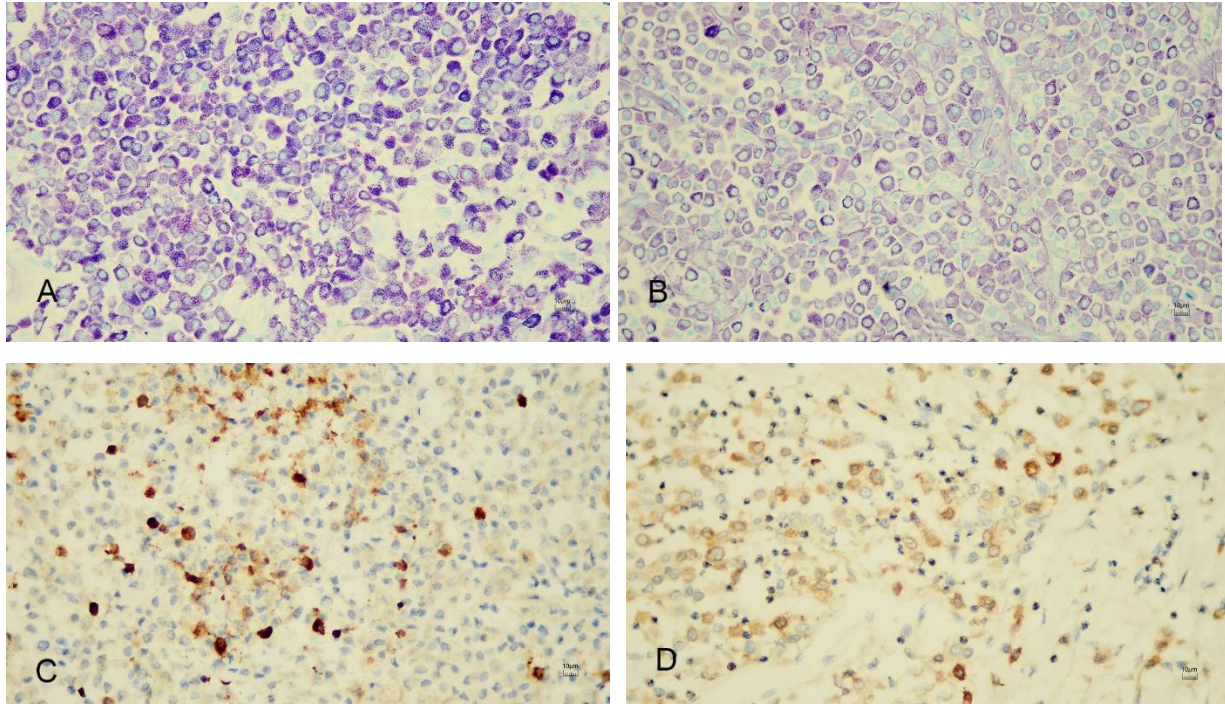

**Figure S3.** Histochemical and immunohistochemical identification of mast cells in canine cutaneous mast cell tumors (MCTs) at 40× magnification. (A) Low-grade MCT stained with toluidine blue, showing numerous well-differentiated mast cells containing dense metachromatic granules. (B) High-grade MCT with reduced numbers of granulated mast cells and diminished metachromasia. (C) Low-grade MCT demonstrating strong cytoplasmic immunoreactivity for mast cell tryptase, highlighting abundant mature mast cells. (D) High-grade MCT exhibiting weaker and more heterogeneous tryptase staining, consistent with reduced mast cell differentiation. Scale bar = 10 μm.



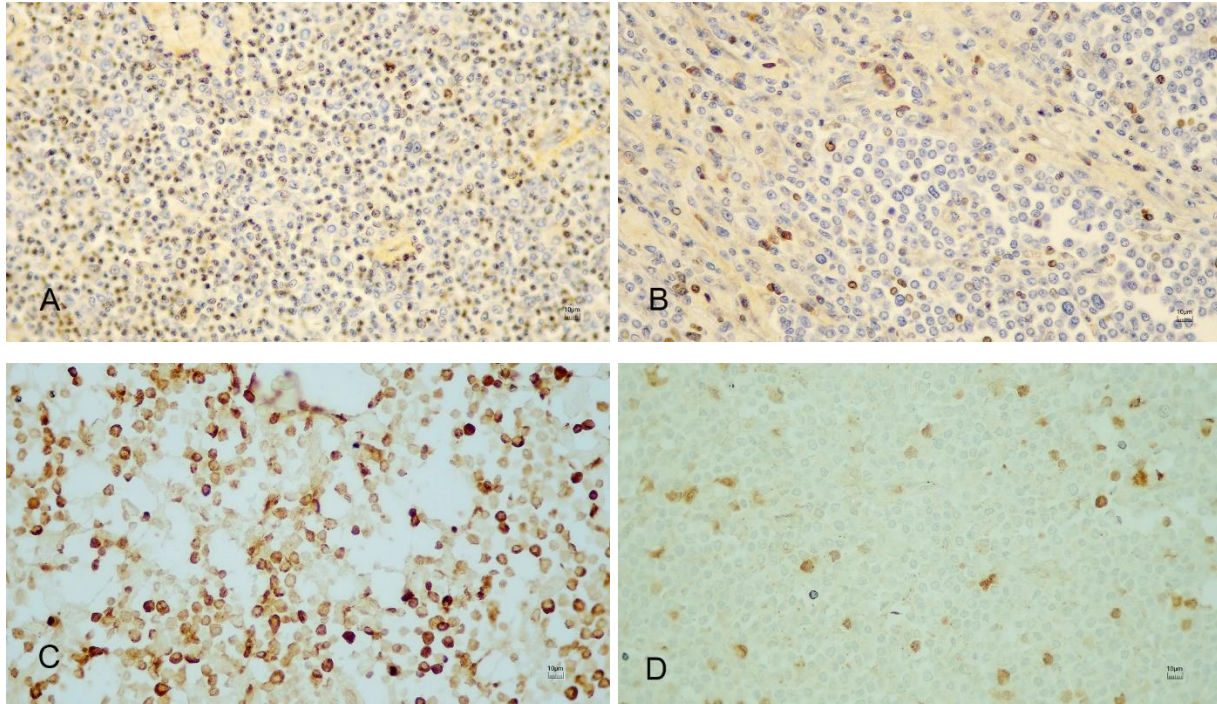

**Figure S4.** Immunohistochemical expression of MHC class I and class II molecules in canine cutaneous mast cell tumors (MCTs), 40× magnification. (A) Low-grade MCT exhibiting strong MHC I immunoreactivity in numerous neoplastic cells. (B) High-grade MCT showing reduced and patchy MHC I staining. (C) Low-grade MCT with diffuse and intense MHC II expression, consistent with enhanced antigen-presenting activity. (D) High-grade MCT demonstrating weak or heterogeneous MHC II staining in the tumor microenvironment. Scale bar = 10 µm.

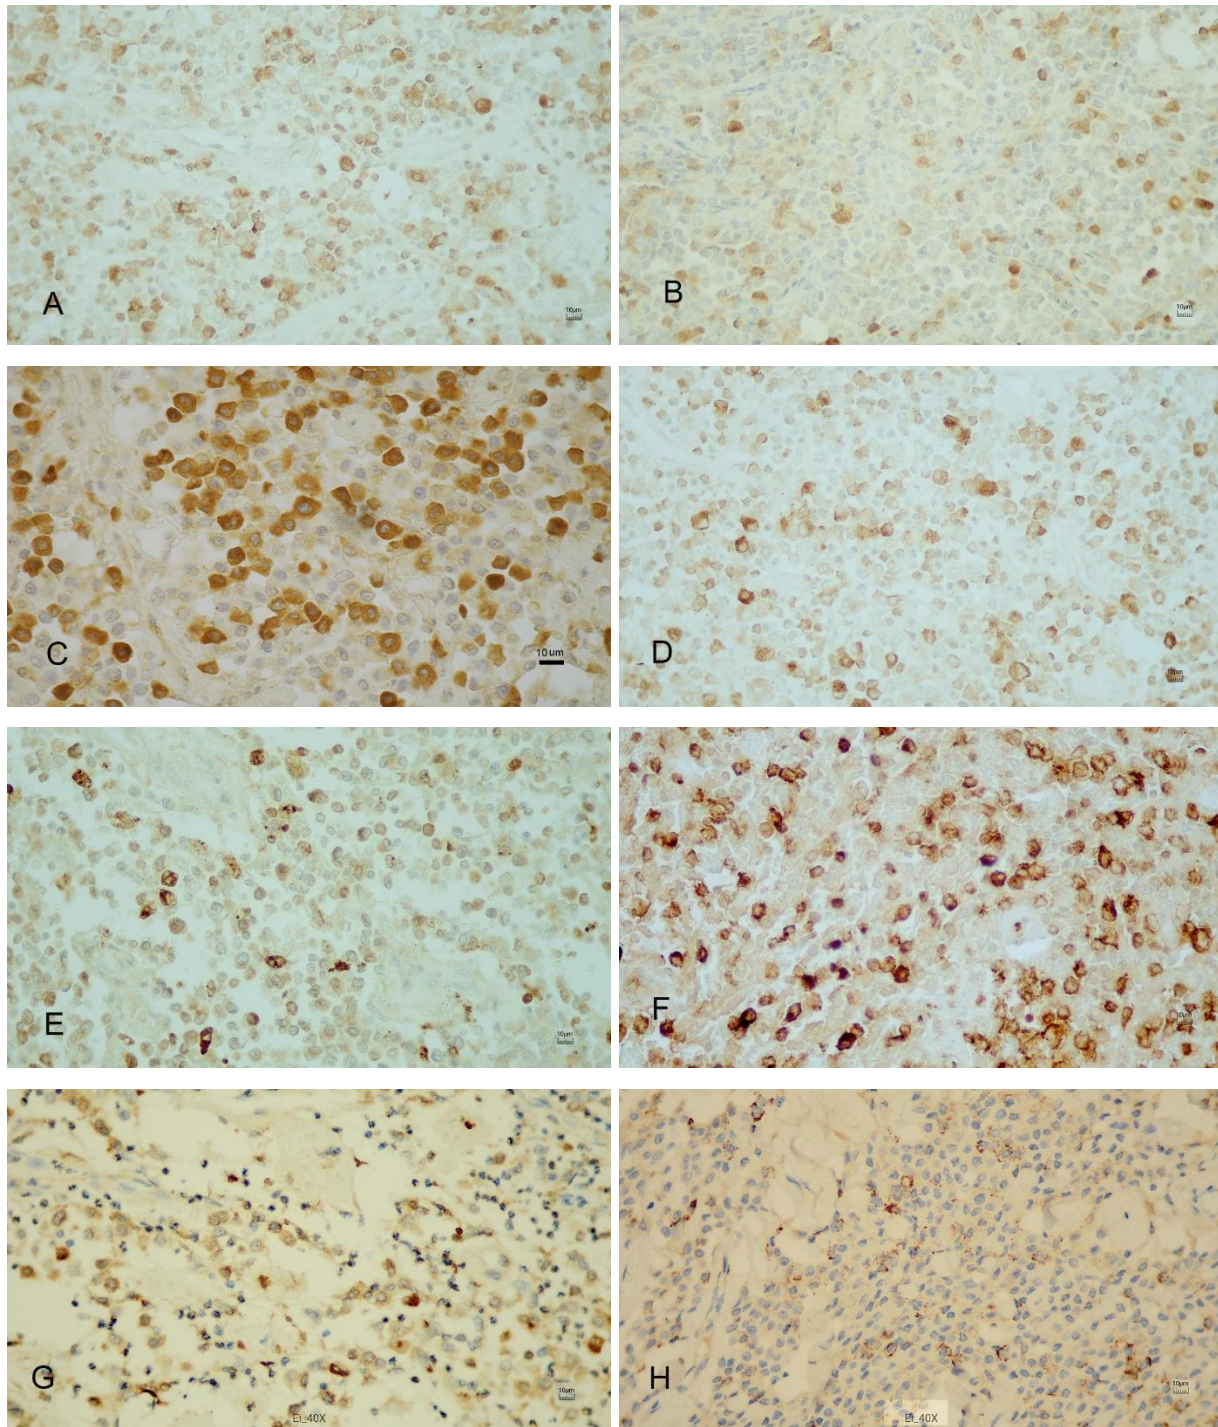

**Figure S5.** Immunohistochemical detection of tumor-infiltrating lymphocyte (TIL) subsets in canine cutaneous mast cell tumors (MCTs), 40× magnification. (A) Low-grade MCT showing dense infiltration of CD4<sup>+</sup> T-helper cells with strong membranous staining. (B) High-grade MCT

with markedly reduced CD4<sup>+</sup> cell density and weaker staining intensity. (C) Low-grade MCT exhibiting moderate infiltration of CD8<sup>+</sup> cytotoxic T lymphocytes (CTLs). (D) High-grade MCT with sparse CD8<sup>+</sup> T-cell presence and reduced immunoreactivity. (E) Low-grade MCT with abundant CD25<sup>+</sup> regulatory T cells displaying intense membrane and cytoplasmic staining. (F) High-grade MCT showing diminished CD25 expression with scattered weakly positive cells. (G) Low-grade MCT with rare CD57<sup>+</sup> lymphocytes. (H) High-grade MCT demonstrating increased but heterogeneously distributed CD57<sup>+</sup> cells, suggestive of activated or senescent T/NK subsets. Scale bar = 10  $\mu$ m.



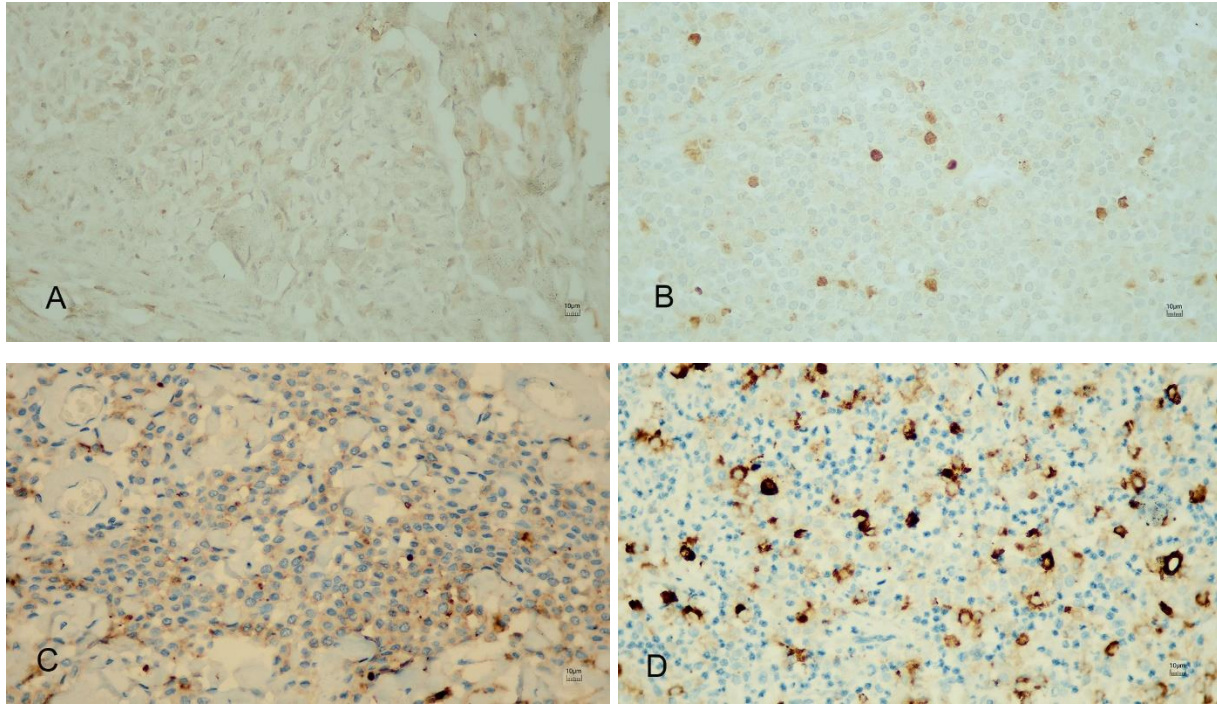

**Figure S6.** Immunohistochemical expression of immune checkpoint molecules PD-1 and PD-L1 in canine cutaneous mast cell tumors (MCTs), 40× magnification. (A) Low-grade MCT with focal PD-1 expression on scattered cells within the tumor microenvironment. (B) High-grade MCT exhibiting increased and stronger PD-1 immunoreactivity. (C) Low-grade MCT demonstrating mild PD-L1 expression in neoplastic cells. (D) High-grade MCT showing increased and stronger PD-L1 staining in tumor cells. Scale bar = 10  $\mu$ m.
