# Supplementary material for: Demographic Patterns and Immunophenotypic Characterization of Tumor–Immune Interactions in Canine Cutaneous Mast Cell Tumors
Source: Research Square preprint supplement (doi:10.21203/rs.3.rs-6766464/v1), 2025-10-26
Supplement: Supplementary file 2 [file 8b01020d171653fedc851ee2.pdf]

## **Supplementary Information 1**

### **Demographic Patterns and Immunophenotypic Characterization of Tumor–Immune Interactions in Canine Cutaneous Mast Cell Tumors**

Sudchaya Bhanpattanakul<sup>1</sup>, Theerawat Tharasanit<sup>2,3</sup>, Achariya Sailasuta<sup>1</sup>, Takayuki Nakagawa<sup>4</sup>,  
Theerayuth Kaewamatawong<sup>1,5\*</sup>

<sup>1</sup> Department of Pathology, Faculty of Veterinary Science, Chulalongkorn University, Bangkok, Thailand

<sup>2</sup> Department of Obstetrics, Gynaecology and Reproduction, Faculty of Veterinary Science, Chulalongkorn University, Bangkok, Thailand

<sup>3</sup> Veterinary Clinical Stem Cells and Bioengineering Research Unit, Chulalongkorn University, Bangkok, Thailand

<sup>4</sup> Laboratory of Veterinary Surgery, Graduate School of Agricultural and Life Sciences, University of Tokyo, 1-1-1, Yayoi, Bunkyo-ku, Tokyo, 113-8657, Japan

<sup>5</sup> Center of Excellence for Companion Animal Cancer (CE-CAC), Department of Pathology, Faculty of Veterinary Science, Chulalongkorn University, Bangkok, Thailand.

Corresponding Author:

Theerayuth Kaewamatawong<sup>1,5\*</sup>

Email address: [theerayuth.k@chula.ac.th](mailto:theerayuth.k@chula.ac.th)

## Supplementary Table

**Table S1** Primary antibodies utilized in this study.

|   | <b>Antibody</b> | <b>Cat. No.</b> | <b>Vendor</b>                          | <b>Clone</b> | <b>Host</b> | <b>Clonality</b> | <b>Dilution</b> |
|---|-----------------|-----------------|----------------------------------------|--------------|-------------|------------------|-----------------|
| 1 | MHC I           | NBP2-61003      | Novus Biologicals                      | DG-H58A      | mouse       | monoclonal       | 1:200           |
| 2 | MHC II          | NCL-LN3         | Novocastra                             | LN3          | mouse       | monoclonal       | 1:300           |
| 3 | CD4             | 104R-16         | Cell Marque                            | SP35         | rabbit      | monoclonal       | 1:200           |
| 4 | CD8             | 108M-96         | Cell Marque                            | C8/144B      | mouse       | monoclonal       | 1:300           |
| 5 | CD25            | 14-0251-82      | eBioscience (Thermo Fisher Scientific) | PC61.5       | Rat         | monoclonal       | 1:100           |

|   |                       |          |       |        |        |            |       |
|---|-----------------------|----------|-------|--------|--------|------------|-------|
| 6 | CD57                  | ab203730 | Abcam | NK-1   | Mouse  | Monoclonal | 1:100 |
| 7 | Mast cell<br>tryptase | M7052    | Dako  | AA1    | Mouse  | Monoclonal | 1:200 |
| 8 | PD-1                  | ab52587  | Abcam | NAT105 | Mouse  | Monoclonal | 1:200 |
| 9 | PD-L1                 | ab205921 | Abcam | 28-8   | Rabbit | Monoclonal | 1:200 |

---
